# Supplementary material
Source: PubMed Central journal article supplement (PMC3307330)
Supplement: supp_M111.316364_jbc.M111.316364-1.pdf [file supp_M111.316364_jbc.M111.316364-1.pdf]

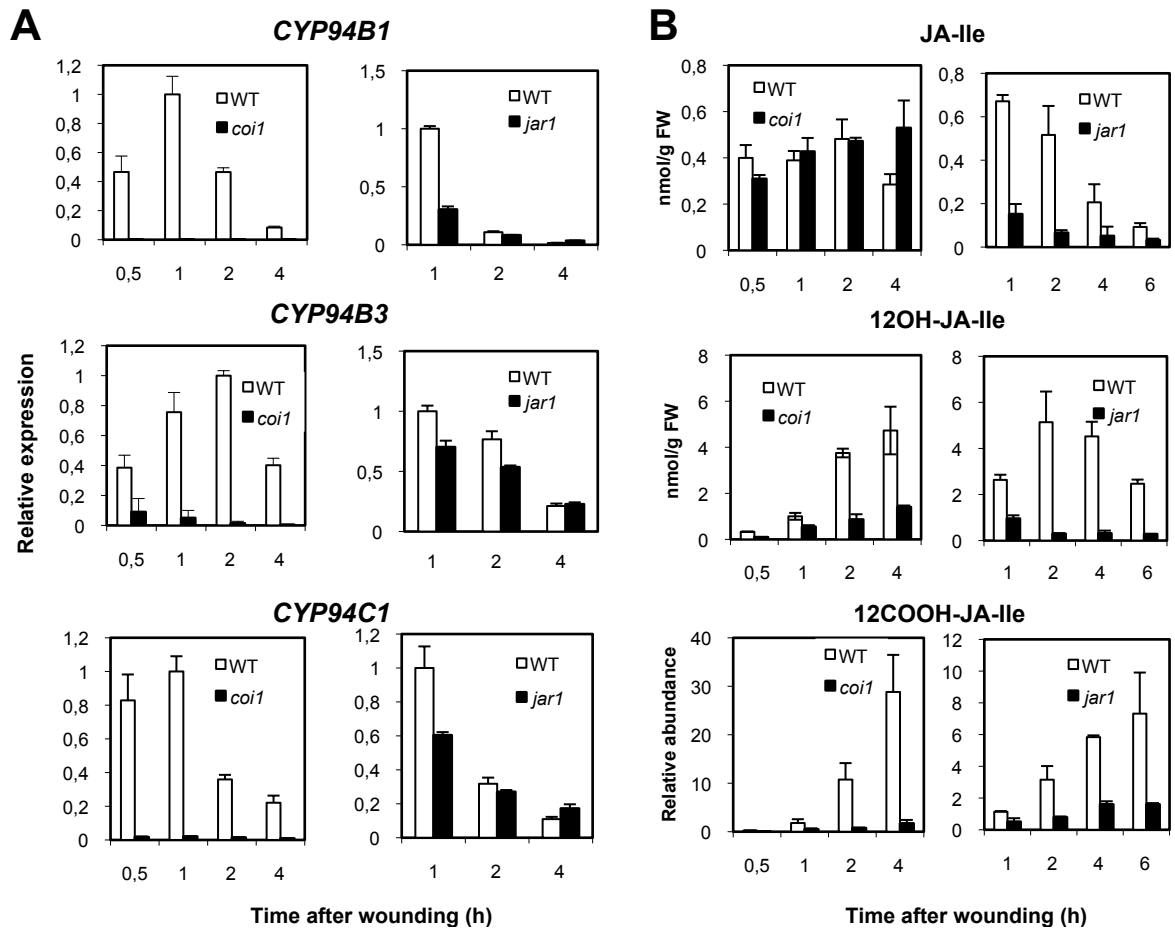

### Supplemental Figure S1 Heitz et al

Expression of CYP94 genes and JA-Ile oxidation in *jar1* and *coi1* mutants upon wounding. *A*, real-time PCR determination of CYP94B1, CYP94B3 and CYP94C1 expression in WT, *coi1-1* (left) and *jar1-1* (right) plants. All expression values are relative to expression at 1 h post-wounding in WT which was set to 1 for each gene. *B*, time course of JA-Ile (upper), 12OH-JA-Ile (middle) and 12COOH-JA-Ile (bottom) accumulation in wounded leaves of wild-type and *coi1-1* (left) or *jar1-1* mutants (right). Data are means  $\pm$  SE from three replicate samples. Two independent experiments were performed with similar results.

T-DNA insertion lines used :  
 cyp94b3-1 : N302217  
 cyp94c1-1 : SALK\_055455

**A** Relative expression of *CYP94* genes 1h post-wounding in selected F2 progeny of a cross between *cyp94b3-1* and *cyp94c1-1*. *CYP94B1* was used as a stimulation control.

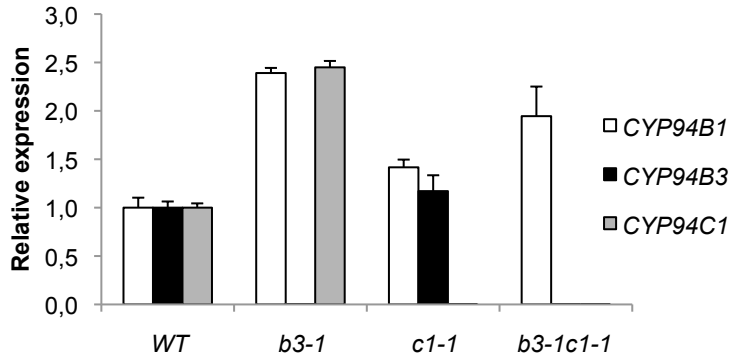

**B** Relative expression of *CYP94B3* and *CYP94C1* genes 1h post-wounding in T2 control (pFGC) plants and plants expressing a silencing construct (RNAi). *CYP94B1* was used as a stimulation control.

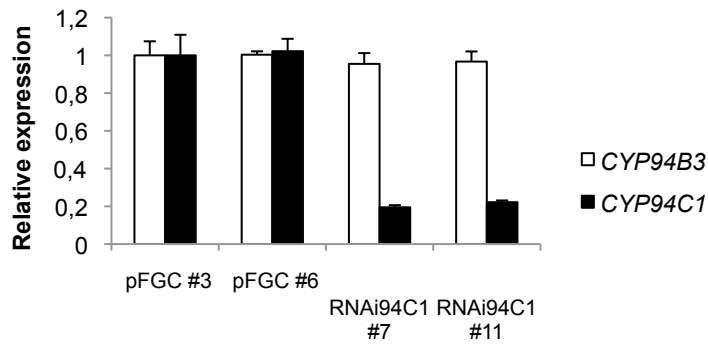

**C** Relative expression of *CYP94C1* in T3 plants of 35S::*CYP94C1* lines 1h post-wounding, relative to WT T0

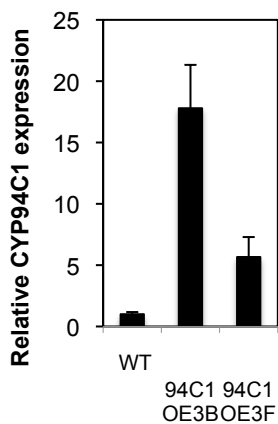

**Supplemental Figure S2 : Heitz et al**  
*CYP94B3* or/and *CYP94C1* gene expression levels in modified plant lines.

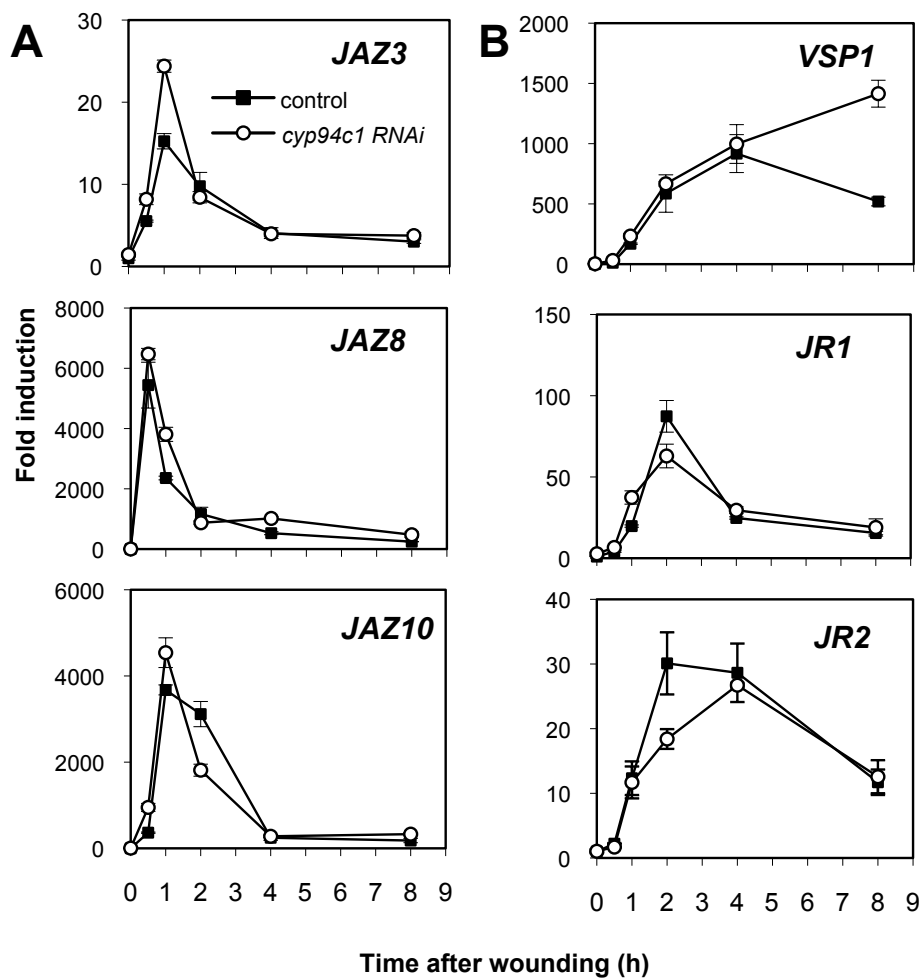

**Supplemental Figure S3** : Heitz et al.

JA-responsive gene expression in CYP94C1-deficient plants upon wounding. Leaves of control (transformed with an empty pFGC vector) and CYP94C1 RNAi plants (same plant set as used in Figure 3A) were mechanically wounded and harvested for RNA extraction. Gene expression time courses were established by real time PCR. Expression is represented as fold induction relative to level at T0 in WT plants that was set to 1 for each gene. *A*, early- responsive JAZ genes. *B*, wound- and jasmonate-responsive defense genes. Data are means  $\pm$  SE from three replicate samples.

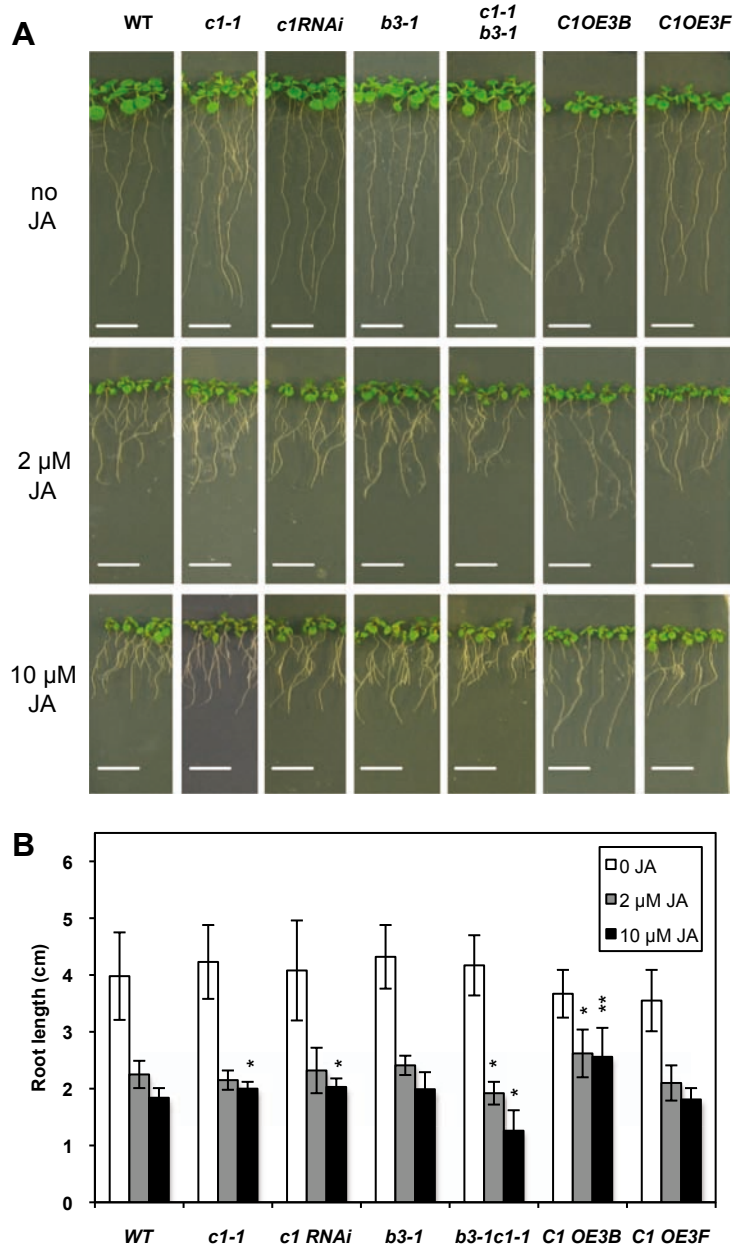

### Supplemental Figure S4 : Heitz et al

**JA-sensitivity of *CYP94*-modified plant lines.** Root growth inhibition assay was performed with WT and *CYP94*-modified plant lines. *A*, Photographs showing root length of seedlings grown for 13d in absence or in presence of the indicated JA concentrations. Scale bar, 1 cm. *B*, Quantification at d11 of primary root length of seedlings show in *A*. Data shown are mean  $\pm$ SD ( $n > 12$ ). Asterisks indicate a significant difference between WT and indicated genotype (t test, \* :  $p < 0.001$ ; \*\* $p < 0.0001$ ).

**Table S1** : Primers used in this study (Heitz et al)

| Use                                                                         | Gene/Allele (locus)        | Primer name            | Sequence (5' -> 3')                         |
|-----------------------------------------------------------------------------|----------------------------|------------------------|---------------------------------------------|
| <b>qPCR</b>                                                                 | <i>CYP94B1</i> (At5g63450) | CYP94B1 qPCR F62       | caatgaggcttaccaccag                         |
|                                                                             |                            | CYP94B1 qPCR R62       | aaatgtcgtcgtttgctgcat                       |
|                                                                             | <i>CYP94B2</i> (At3g01900) | CYP94B2-F              | caacggtgacggaaacctct                        |
|                                                                             |                            | CYP94B2-R              | gggggtgaagtcgtgtgtagc                       |
|                                                                             | <i>CYP94B3</i> (At3g48520) | CYP94B3 qPCR F62       | tggcttacacgaagcctgtc                        |
|                                                                             |                            | CYP94B3 qPCR R62       | agtccacgaaactggaggat                        |
|                                                                             |                            | CYP94B3 1,15-F*        | acgtgtcaagagaggaggagacaaagt                 |
|                                                                             |                            | CYP94B3 1,25-R*        | caccggttcgggftaaactcttctg                   |
|                                                                             | <i>CYP94C1</i> (At2g27690) | CYP94C1 qPCR F63       | ggcccggattacgaagagttt                       |
|                                                                             |                            | CYP94C1 qPCR R63       | ggccggaacttaccttcgtt                        |
|                                                                             |                            | 94C1-F-N55455**        | ctcatctcttctctcacctt                        |
|                                                                             |                            | 94C1-R-N55455**        | agacgatggtgaatgatatgattag                   |
|                                                                             | <i>CYP94D1</i> (At1g34540) | CYP94D1-F              | cctgtgccagtggacataaag                       |
|                                                                             |                            | CYP94D1-R              | caaatgtccatcaggcaat                         |
| <i>CYP94D2</i> (At3g56630)                                                  | CYP94D2-F                  | ccgtcgaaatcaacactagcc  |                                             |
|                                                                             | CYP94D2-R                  | gcgaaccgctccaatatgt    |                                             |
| <i>OPR3</i> (At2g06050)                                                     | OPR3-F                     | gctcgttaccttcacgttacac |                                             |
|                                                                             | OPR3-R                     | cttgaaccgcgaaaccaaaccg |                                             |
| <i>VSP1</i> (At5g24780)                                                     | VSP1-F                     | ccgtcaatgtttgatctttg   |                                             |
|                                                                             | VSP1-R                     | gctgtgttctcggtcccata   |                                             |
| * and ** : primers used for <i>cyp94b3-1</i> * or <i>cyp94c1-1</i> ** lines |                            |                        |                                             |
| <b><i>CYP94C1</i> RNAi construct</b>                                        |                            |                        |                                             |
|                                                                             | <i>CYP94C1</i>             | CYP94C1 RNAi NX        | gatgccatggtctagagagtttgaacttgaagtg          |
|                                                                             |                            | CYP94C1 RNAi AB        | cattggcgcgccgatccgtttccataacagaggaaacg      |
| <b><i>CYP94C1</i> construct for overexpression <i>in planta</i></b>         |                            |                        |                                             |
|                                                                             | <i>CYP94C1</i>             | CYP94C1-SK63S          | aaaaagcaggctatgttactaatcatatcattacc         |
|                                                                             |                            | CYP94C1-SK63R2         | agaaagctgggtctaactcttcttggatcataac          |
| <b><i>CYP94</i> expression in yeast</b>                                     |                            |                        |                                             |
|                                                                             | <i>CYP94B3</i>             | CYP94B3-pYEDP60-F      | tccccgggatggcatttctctgagttttgatactagc       |
|                                                                             |                            | CYP94B3-pYEDP60-R      | ccggaattctaaacgttgtaaggatgtgacttctctc       |
|                                                                             | <i>CYP94C1</i>             | CYP94C1-pYeDP60-F      | ccccccgggatgttactaatcatatcattc              |
|                                                                             |                            | CYP94C1-pYeDP60-R      | cccccgagctcctaattggtgatggtgactcttcttggatcat |
| <b>T-DNA genotyping</b>                                                     |                            |                        |                                             |
|                                                                             | T-DNA                      | LBb1.3 (SALK)          | atfttgcgatttcgaac                           |
|                                                                             |                            | o8409 (GABI-Kat)       | atattgaccatcatactcattgc                     |
|                                                                             | <i>cyp94b3-1</i>           | CYP94B3-0,72F          | gaacgtgggaagcgagaggaagc                     |
|                                                                             |                            | BO1BG68                | tggtttggttctcactgttcac                      |
|                                                                             | <i>cyp94c1-1</i>           | SALK_055455 LP         | tgtcttttggaaagtagcacc                       |
|                                                                             |                            | SALK_055455 RP         | gattccacggcctaaaagatc                       |
